# Supplementary material for: Synthesis, Characterization, and Thermal Study of Divalent Germanium, Tin, and Lead Triazenides as Potential Vapor Deposition Precursors
Source: PubMed Central journal article supplement (PMC8424630; doi:10.1021/acs.inorgchem.1c00695), 2021-08-06
Supplement: ic1c00695_si_001.pdf [file ic1c00695_si_001.pdf]

## Supporting information

for

### **Synthesis, Characterization and Thermal Study of Divalent Germanium, Tin and Lead Triazenides as Potential Vapor Deposition Precursors**

Rouzbeh Samii,<sup>[a]</sup> David Zanders,<sup>[b],[c]</sup> Anton Fransson,<sup>[a]</sup> Goran Bačić,<sup>[b]</sup> Sean T. Barry,<sup>[b]</sup> Lars Ojamäe,<sup>[a]</sup> Vadim Kessler,<sup>[d]</sup> Henrik Pedersen,<sup>[a]</sup> and Nathan J. O'Brien<sup>\*,[a]</sup>

<sup>[a]</sup> Department of Physics, Chemistry and Biology, Linköping University, SE-581 83 Linköping, Sweden

<sup>[b]</sup> Department of Chemistry, Carleton University, 1125 Colonel By Drive, Ottawa, Ontario, K1S5B6, Canada

<sup>[c]</sup> Faculty of Chemistry and Biochemistry, Ruhr University Bochum, Universitätsstraße 150, 44801, Bochum, Germany

<sup>[d]</sup> Department of Molecular Sciences, Swedish University of Agricultural Sciences, P.O. Box 7015, 75007 Uppsala, Sweden

\*Corresponding author: [nathan.o.brien@liu.se](mailto:nathan.o.brien@liu.se)

Table of contents

|                                   |        |
|-----------------------------------|--------|
| NMR Spectra                       | S1-4   |
| Thermogravimetric Analysis        | S5-6   |
| Differential Scanning Calorimetry | S7     |
| EI-MS Data                        | S8     |
| X-ray Crystallographic Analysis   | S9-11  |
| Computational Calculations        | S12-13 |

## NMR Spectra

$^1\text{H}$  NMR ( $\text{C}_6\text{D}_6$ , 300 MHz)  
(1,3-di-*tert*-butyltriazene)Li(I)

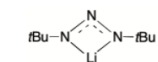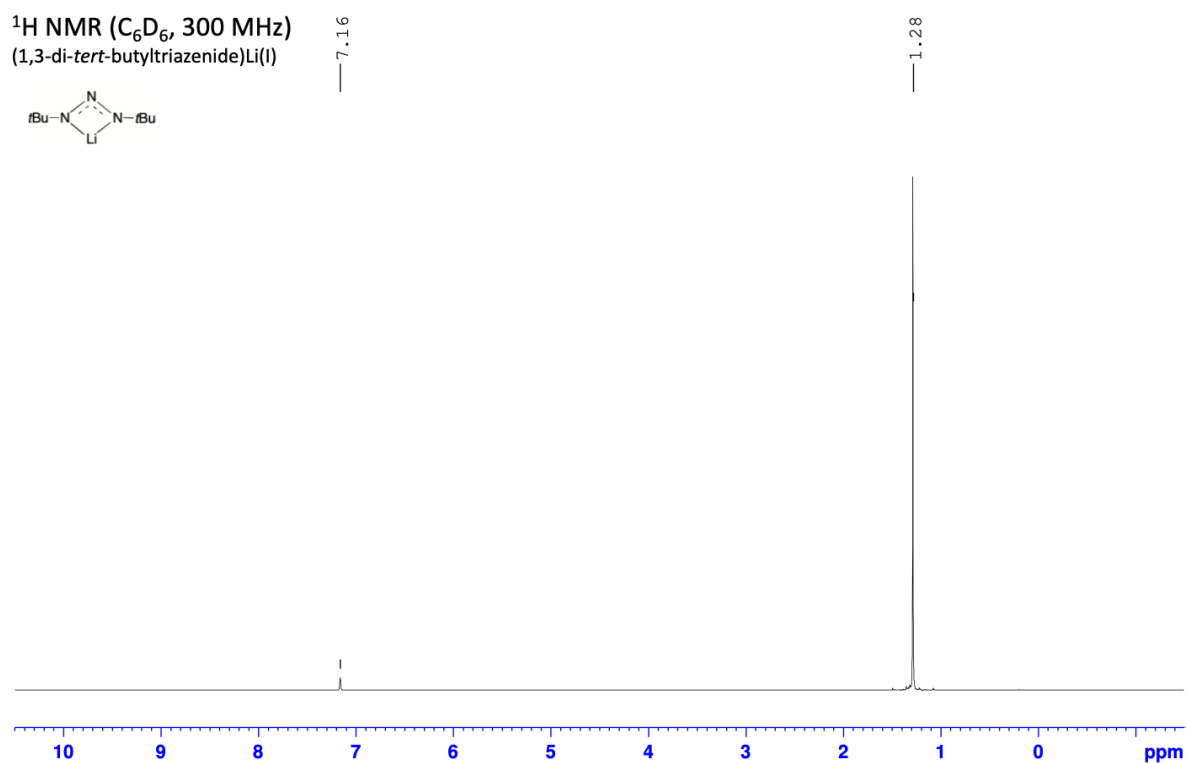

Figure S1:  $^1\text{H}$  NMR (300 MHz) spectrum of (1,3-di-*tert*-butyltriazene)lithium(I) in  $\text{C}_6\text{D}_6$ .

$^{13}\text{C}$  NMR ( $\text{C}_6\text{D}_6$ , 75 MHz)  
(1,3-di-*tert*-butyltriazene)lithium(I)

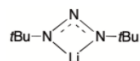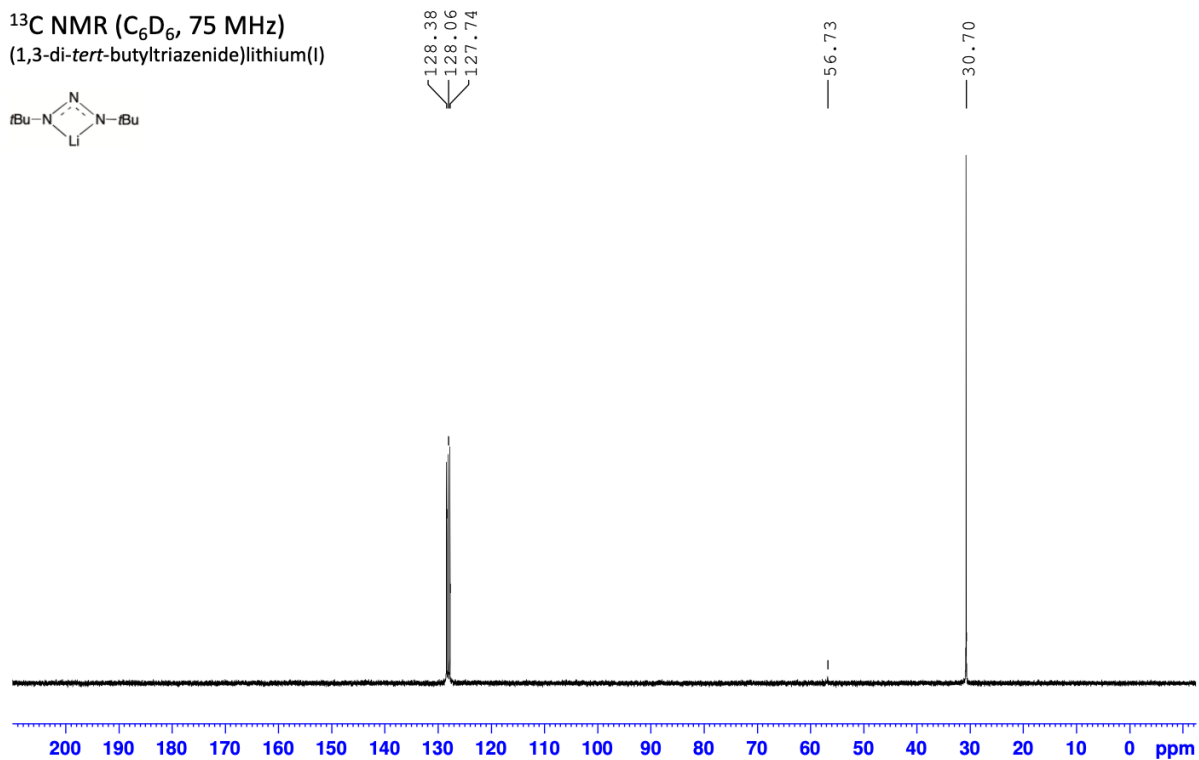

Figure S2:  $^{13}\text{C}$  NMR (75 MHz) spectrum of (1,3-di-*tert*-butyltriazene)lithium(I) in  $\text{C}_6\text{D}_6$ .

$^1\text{H}$  NMR ( $\text{C}_6\text{D}_6$ , 300 MHz)  
Bis(1,3-di-*tert*-butyltriazene)germanium(II)

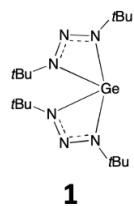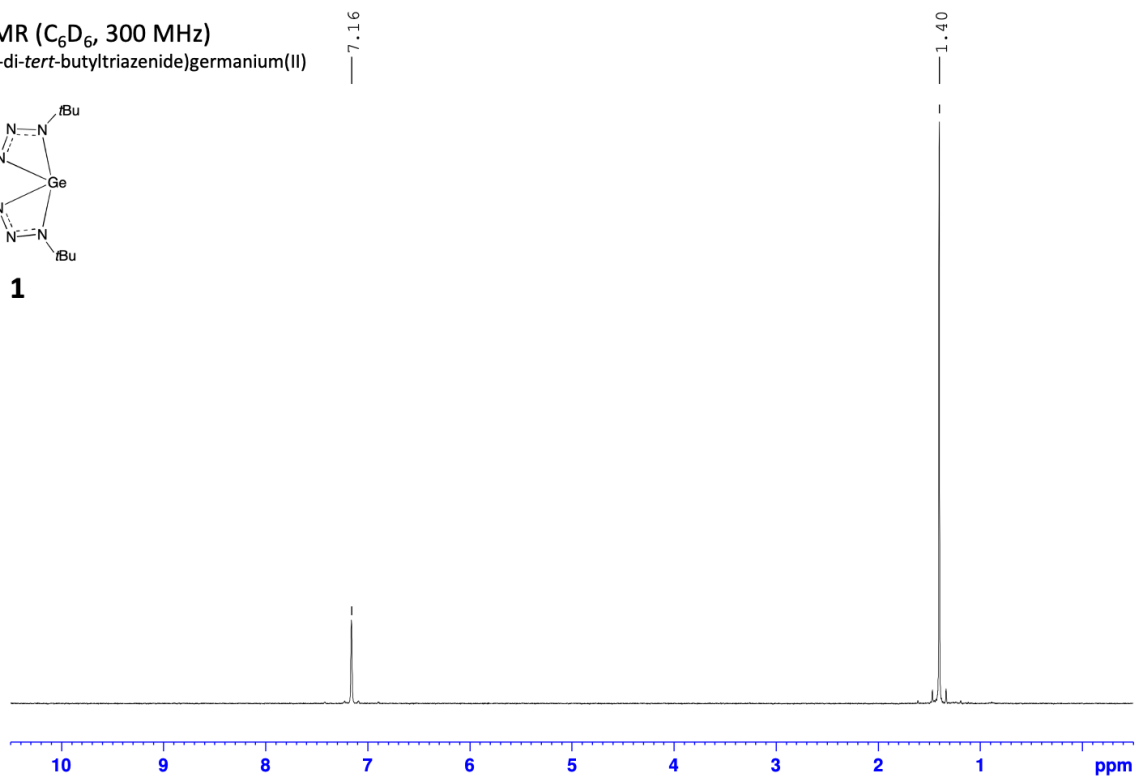

Figure S3:  $^1\text{H}$  NMR (300 MHz) spectrum of **1** in  $\text{C}_6\text{D}_6$ .

$^{13}\text{C}$  NMR ( $\text{C}_6\text{D}_6$ , 125 MHz)  
Bis(1,3-di-*tert*-butyltriazene)germanium(II)

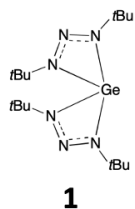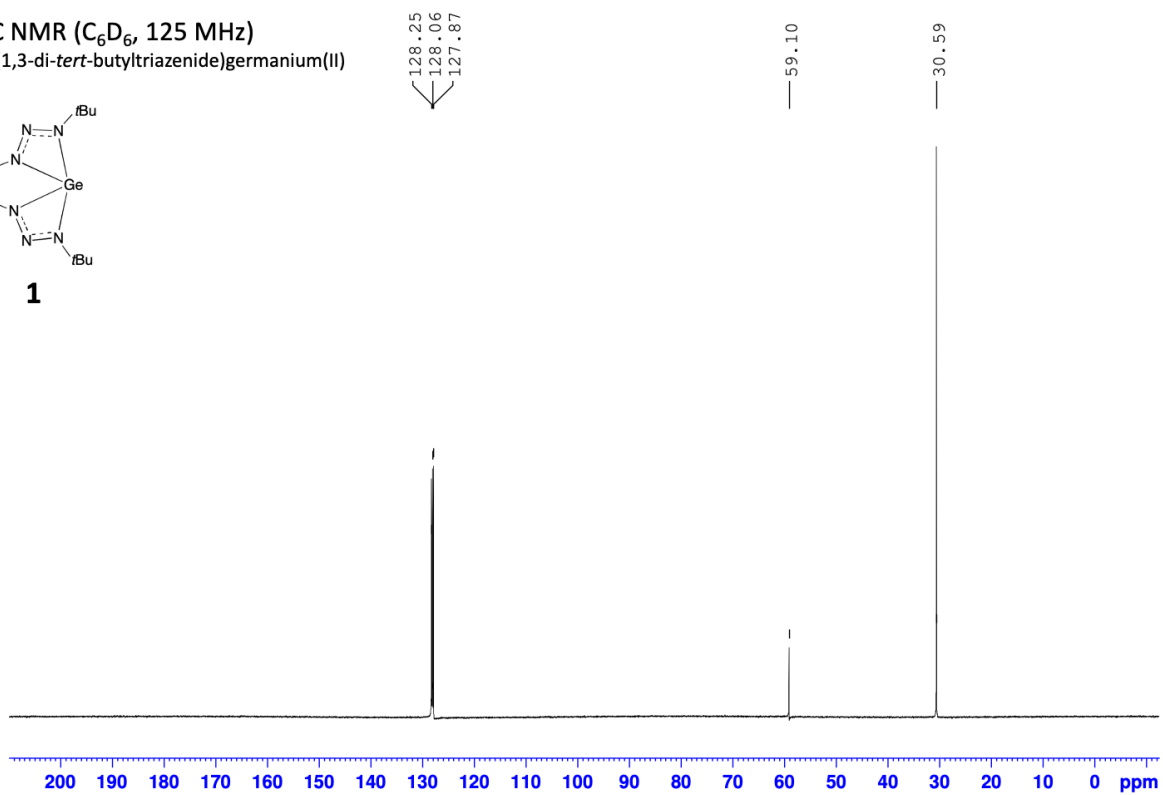

Figure S4:  $^{13}\text{C}$  NMR (125 MHz) spectrum of **1** in  $\text{C}_6\text{D}_6$ .

$^1\text{H}$  NMR ( $\text{C}_6\text{D}_6$ , 500 MHz)  
Bis(1,3-di-*tert*-butyltriazene)tin(II)

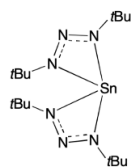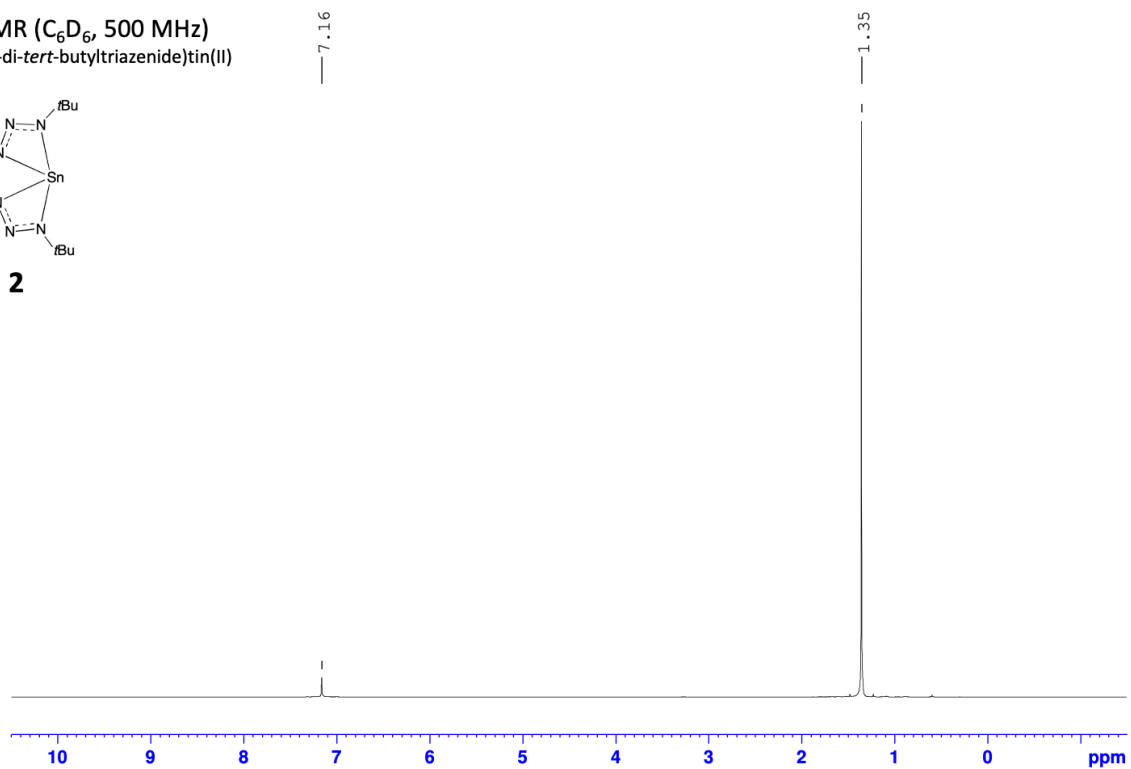

Figure S5:  $^1\text{H}$  NMR (500 MHz) spectrum of **2** in  $\text{C}_6\text{D}_6$ .

$^{13}\text{C}$  NMR ( $\text{C}_6\text{D}_6$ , 125 MHz)  
Bis(1,3-di-*tert*-butyltriazene)tin(II)

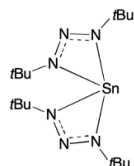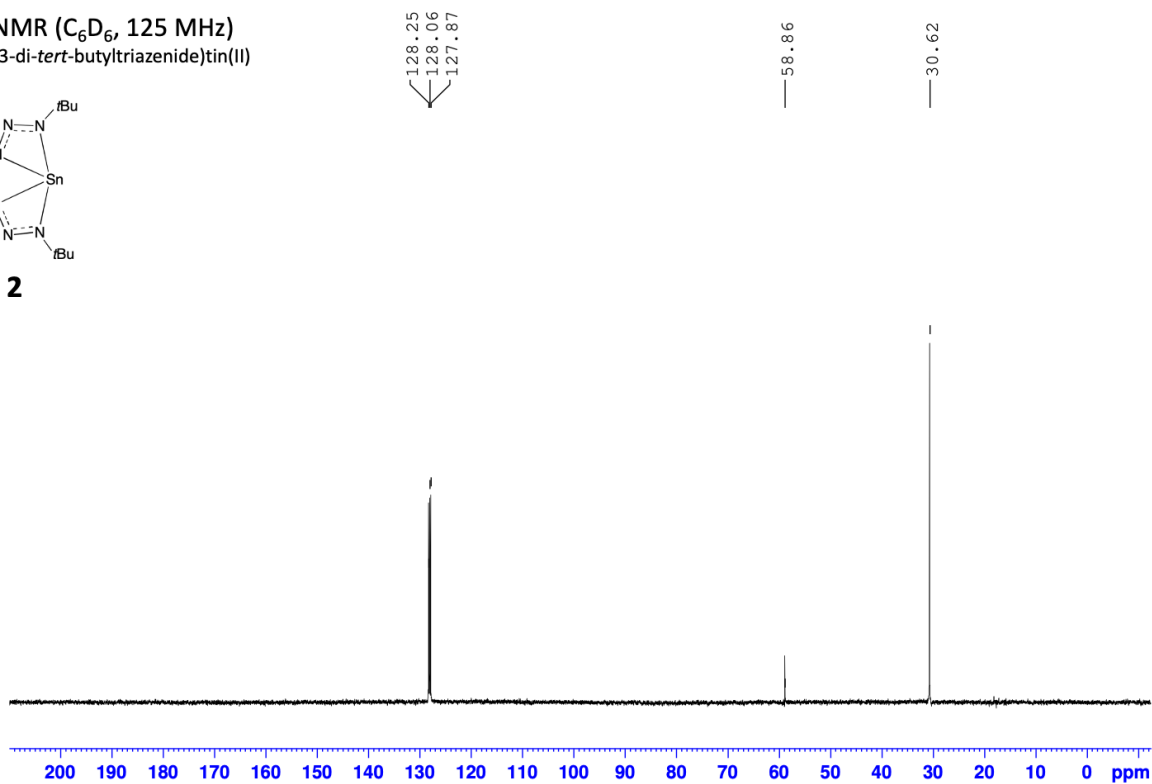

Figure S6:  $^{13}\text{C}$  NMR (125 MHz) spectrum of **2** in  $\text{C}_6\text{D}_6$ .

$^1\text{H}$  NMR ( $\text{C}_6\text{D}_6$ , 500 MHz)  
Bis(1,3-di-*tert*-butyltriazene)lead(II)

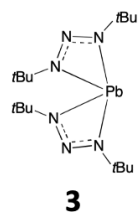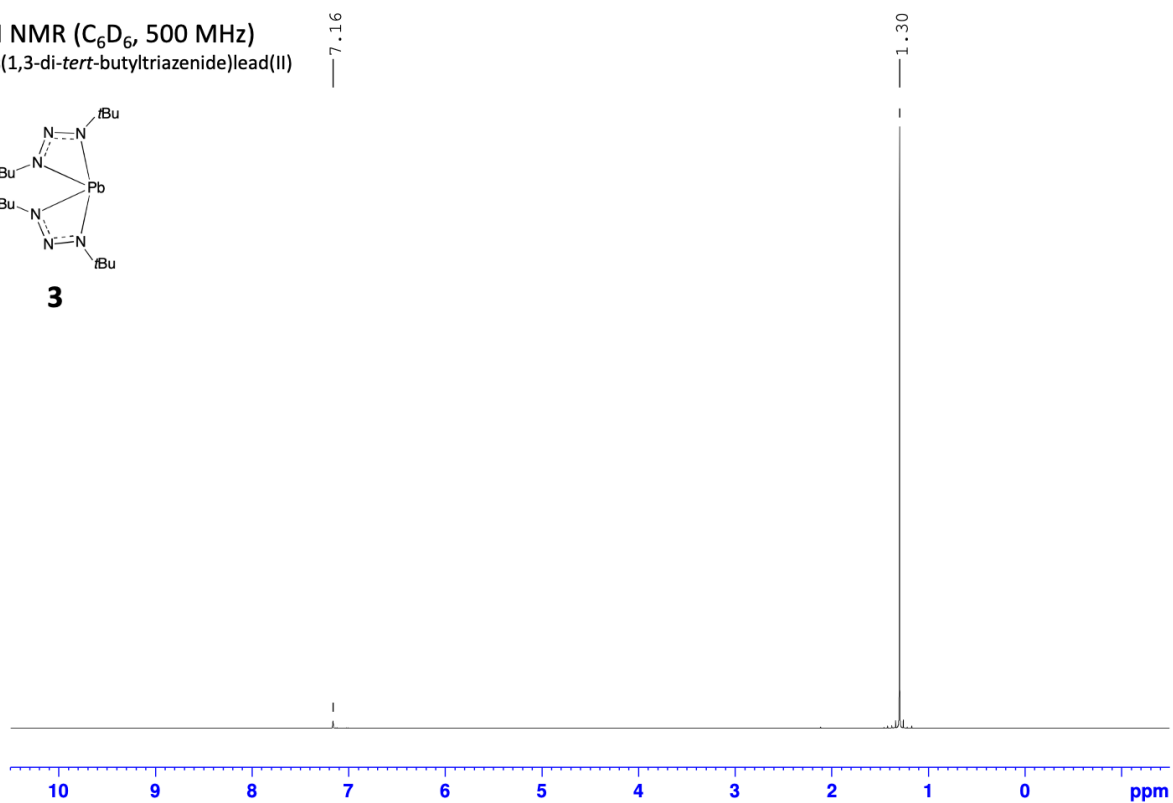

Figure S7:  $^1\text{H}$  NMR (500 MHz) spectrum of **3** in  $\text{C}_6\text{D}_6$ .

$^{13}\text{C}$  NMR ( $\text{C}_6\text{D}_6$ , 125 MHz)  
Bis(1,3-di-*tert*-butyltriazene)lead(II)

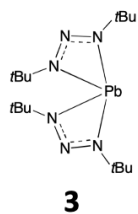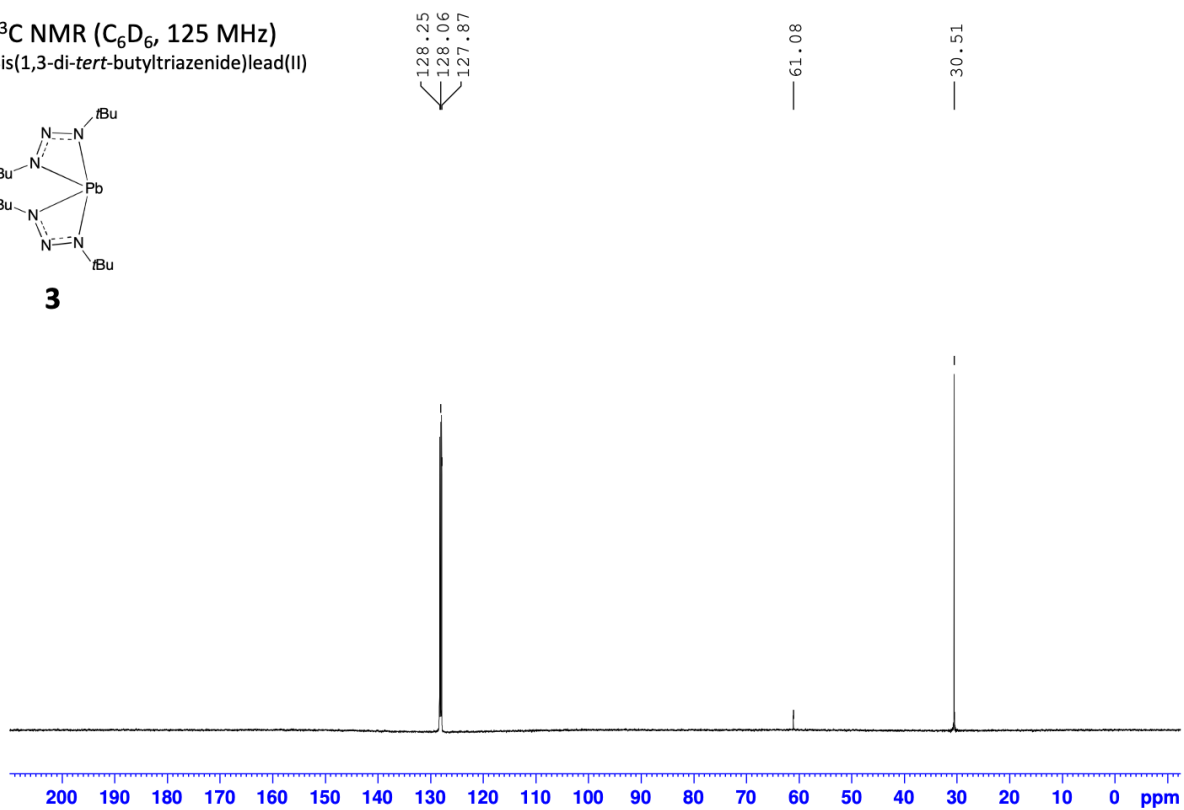

Figure S8:  $^{13}\text{C}$  NMR (125 MHz) spectrum of **3** in  $\text{C}_6\text{D}_6$ .

## Thermogravimetric Analysis

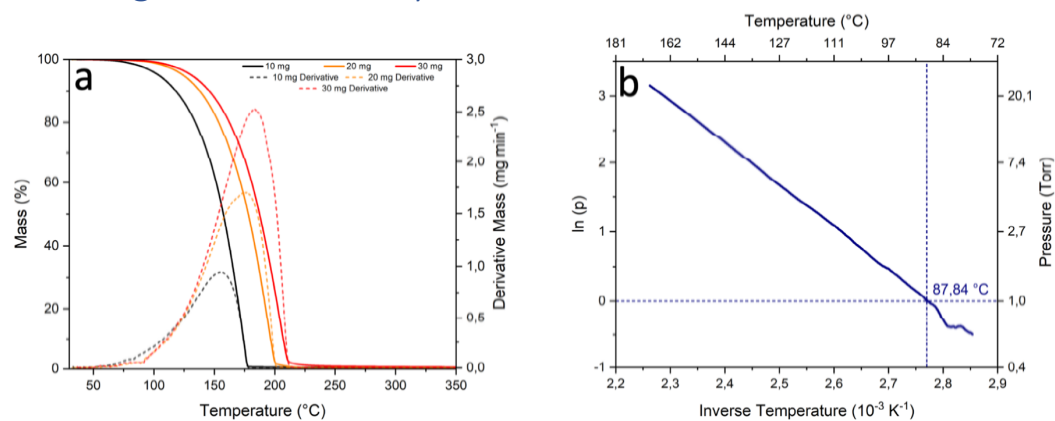

Figure S9: TGA of **1** (a) and Clausius-Clapeyron plot of **1** for derived from TGA data using 10 mg sample size (b).

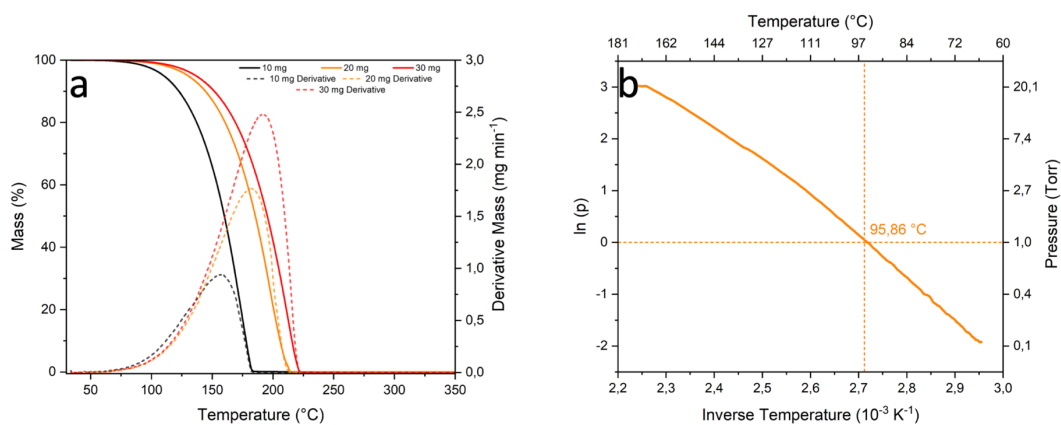

Figure S10: TGA of **2** (a) and Clausius-Clapeyron plot of **1** for derived from TGA data using 10 mg sample size (b).

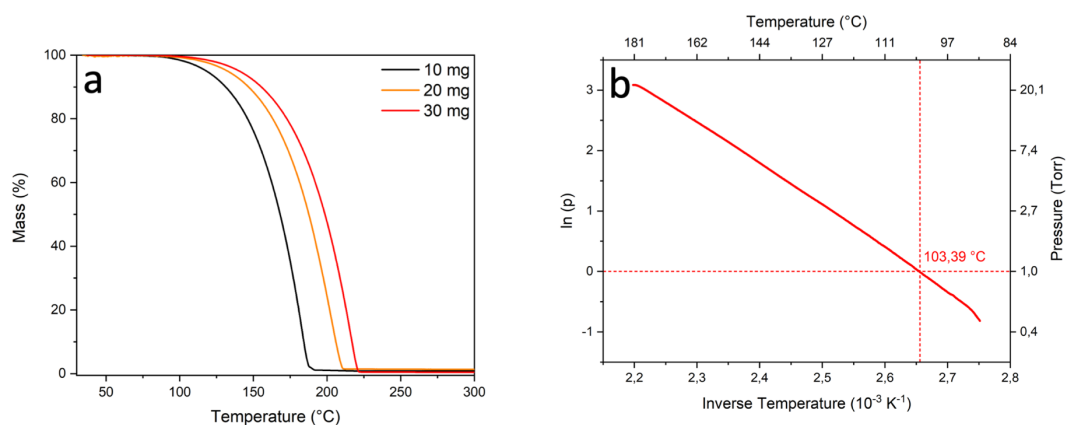

Figure S11: TGA of **3** (a) and Clausius-Clapeyron plot of **1** for derived from TGA data using 10 mg sample size (b).

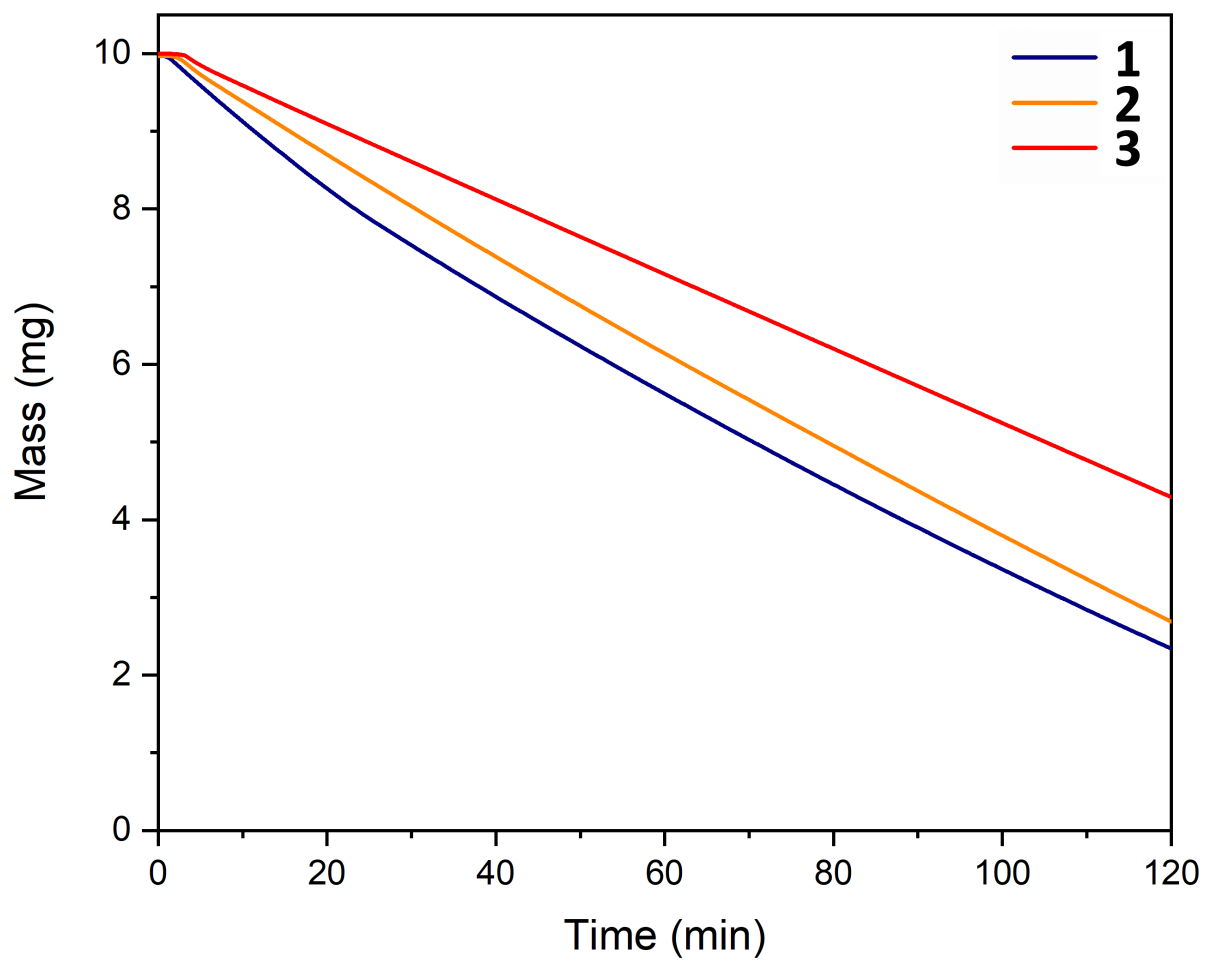

Figure S12: Isothermal TGA of **1–3** at 90 °C.

## Differential Scanning Calorimetry

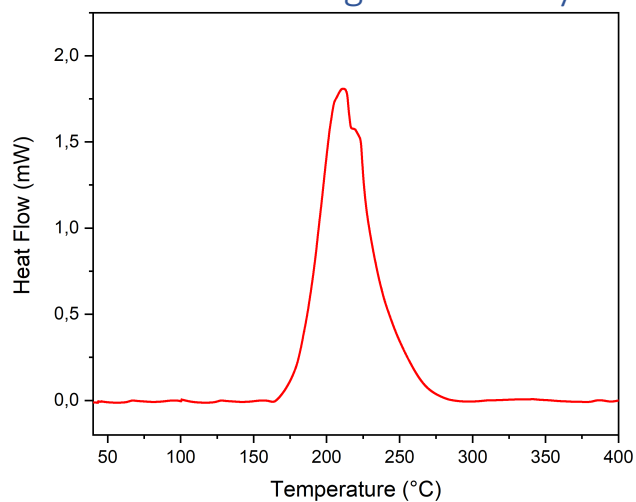

Figure S13: Base line corrected DSC of **1**.

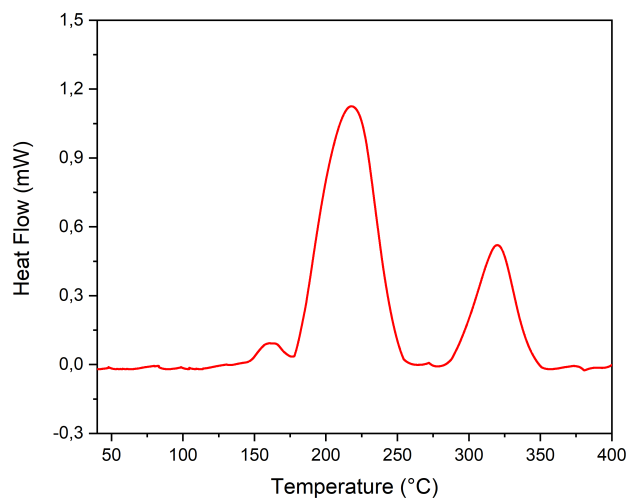

Figure S14: Base line corrected DSC of **2**.

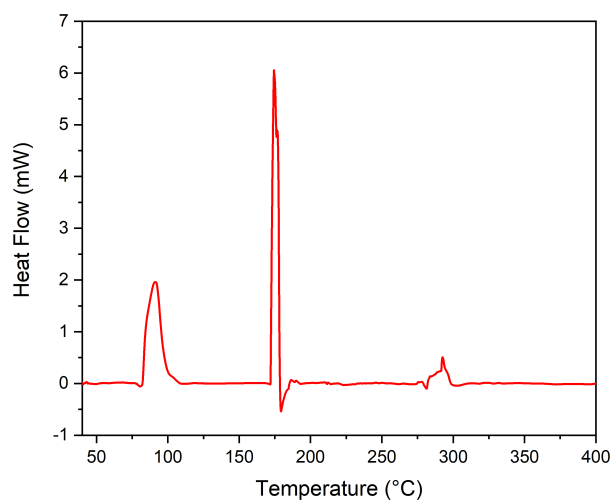

Figure S15: Base line corrected DSC of **3**.



## EI-MS Data

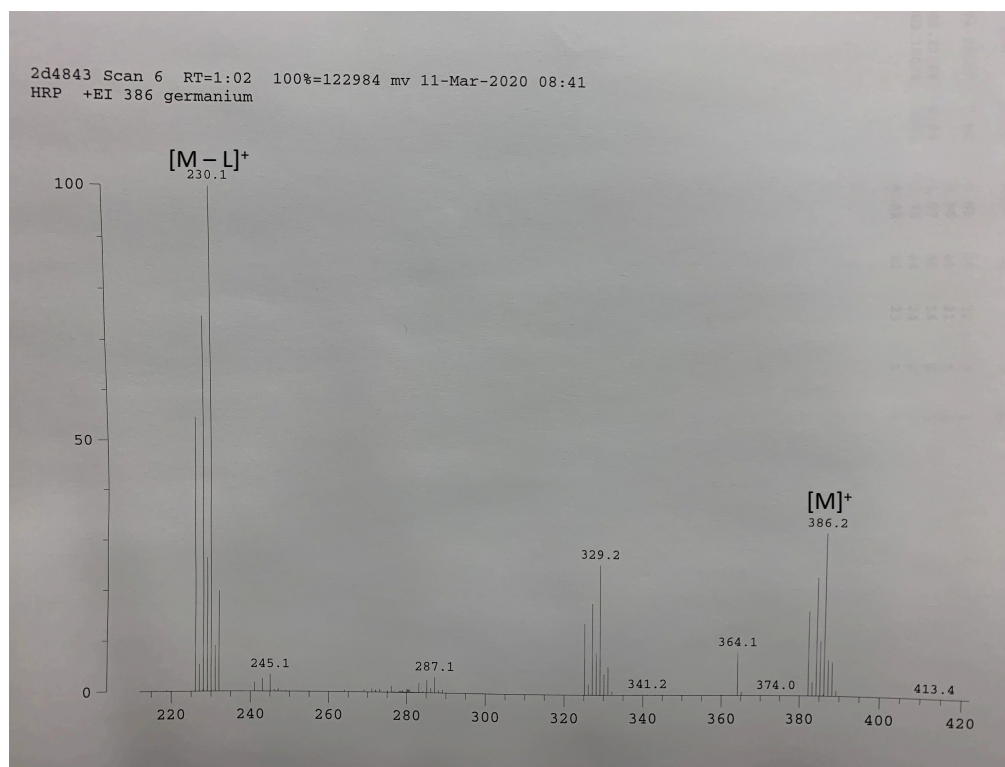

Figure S16: EI-MS of **1**.

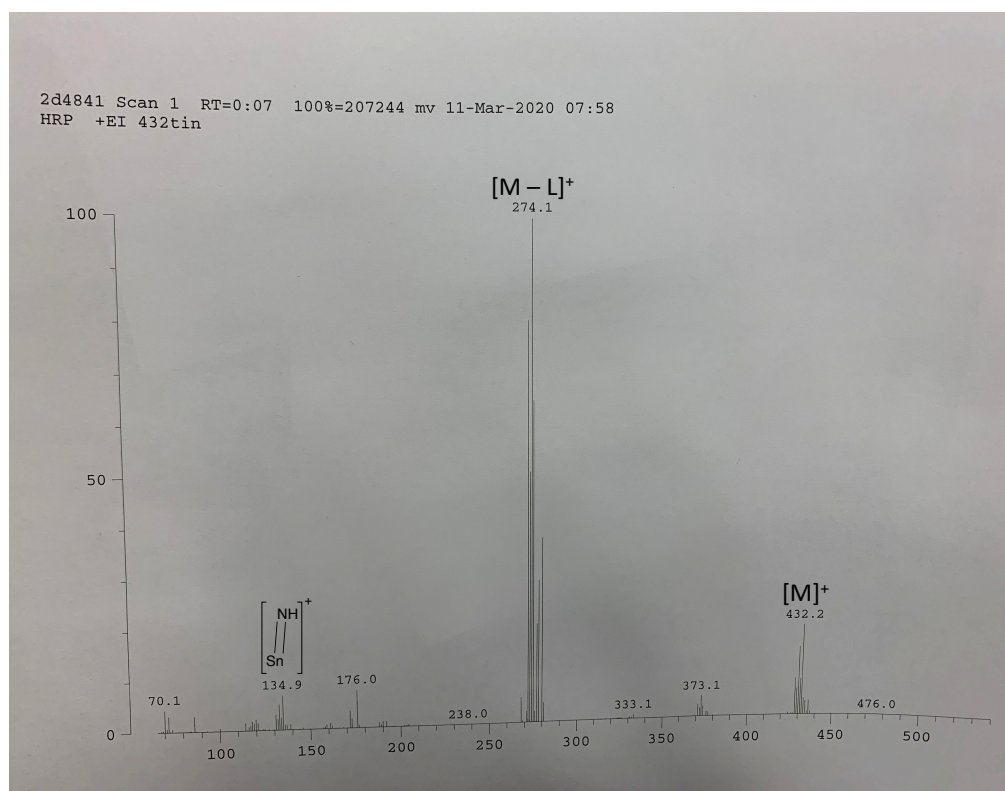

Figure S17: EI-MS of **2**.

## X-ray Crystallographic Analysis

Table S1: Bond lengths (Å) and bond angles (°) for **1** from structure determination by X-ray crystallography and quantum chemical DFT calculations.

|                 | XRD    | DFT    |
|-----------------|--------|--------|
| Ge1–N1          | 1.995  | 2.036  |
| Ge1–N2          | 2.217  | 2.276  |
| N1–N3           | 1.310  | 1.297  |
| N2–N3           | 1.301  | 1.280  |
| N1–C1           | 1.477  | 1.478  |
| N2–C2           | 1.479  | 1.482  |
| N1–Ge1–N1       | 98.15  | 96.48  |
| N1–Ge1–N2 inter | 98.25  | 94.77  |
| N1–Ge1–N2 intra | 59.64  | 58.24  |
| N2–Ge1–N2       | 147.92 | 141.12 |
| N1–N3–N2        | 107.35 | 109.54 |

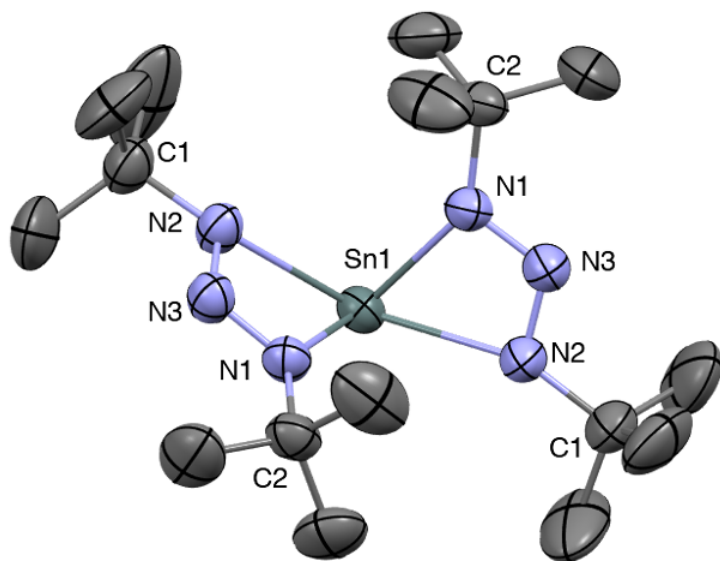

Figure S18: Crystal structure of **2**, thermal ellipsoids are depicted at 50% probability level and all hydrogens were removed for clarity.

Table S2: Bond lengths (Å) and bond angles (°) for **2** from structure determination by X-ray crystallography and quantum chemical DFT calculations.

|        | XRD   | DFT   |
|--------|-------|-------|
| Sn1–N2 | 2.207 | 2.248 |

|                 |        |        |
|-----------------|--------|--------|
| Sn1–N3          | 2.388  | 2.423  |
| N1–N2           | 1.295  | 1.291  |
| N1–N3           | 1.293  | 1.280  |
| N2–C2           | 1.486  | 1.475  |
| N3–C1           | 1.471  | 1.479  |
| N2–Sn1–N2       | 93.99  | 92.18  |
| N3–Sn1–N3       | 133.39 | 131.31 |
| N2–Sn1–N3_inter | 92.05  | 90.91  |
| N2–Sn1–N3_intra | 54.87  | 54.02  |
| N2–N1–N3        | 110.27 | 111.59 |

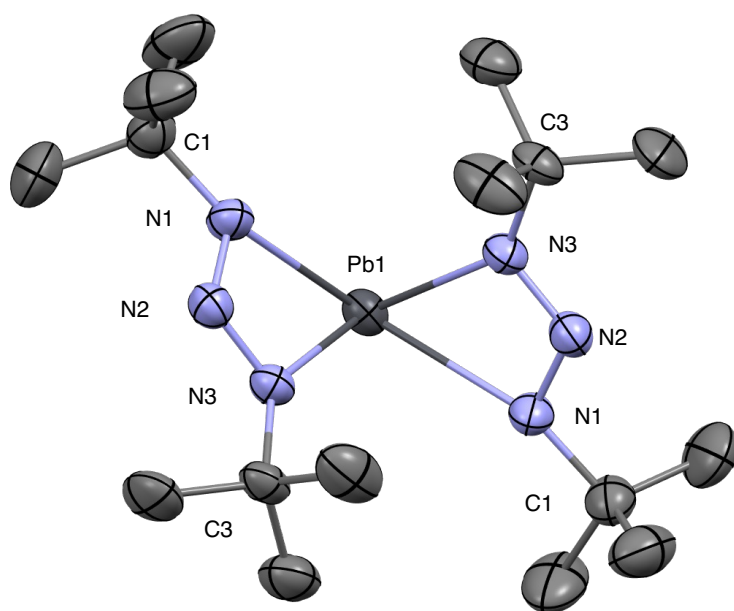

Figure S19: Crystal structure of **3**, thermal ellipsoids are depicted at 50% probability level and all hydrogens were removed for clarity.

Table S3: Bond lengths (Å) and bond angles (°) for **3** from structure determination by X-ray crystallography and quantum chemical DFT calculations.

|        | XRD   | DFT   |
|--------|-------|-------|
| Pb1–N1 | 2.503 | 2.423 |
| Pb1–N3 | 2.328 | 2.248 |
| N1–N2  | 1.292 | 1.291 |
| N2–N3  | 1.291 | 1.280 |
| N1–C1  | 1.476 | 1.475 |

|                 |        |        |
|-----------------|--------|--------|
| N3–C3           | 1.472  | 1.479  |
| N1–Pb1–N1       | 129.61 | 131.31 |
| N3–Pb1–N3       | 92.13  | 92.18  |
| N1–Pb1–N3_inter | 91.01  | 90.91  |
| N1–Pb1–N3_intra | 52.54  | 54.02  |
| N1–N2–N3        | 112.21 | 111.59 |

Geometry index,  $\tau'_4$ , is defined as:

$$\tau'_4 = \frac{\beta - \alpha}{360^\circ - 109.5^\circ} + \frac{180^\circ - \beta}{180^\circ - 109.5^\circ},$$

where  $\alpha$  and  $\beta$  are the two widest N–M–N angles and  $\beta > \alpha$ . For compound **1**, the widest angles are 98.25 and 147.92° (Table S1). Substituting  $\alpha$  and  $\beta$  for 98.25 and 147.92°, respectively in the equation for calculating  $\tau'_4$  gives:

$$\tau'_4 = \frac{147.92 - 98.25}{360^\circ - 109.5^\circ} + \frac{180^\circ - 147.92}{180^\circ - 109.5^\circ} \approx 0.65.$$

Similar calculations for compound **2** using  $\alpha = 93.99^\circ$  and  $\beta = 133.39^\circ$  (Table S2) yields  $\tau'_4 = 0.82$ , and for compound **3** using  $\alpha = 92.13^\circ$  and  $\beta = 129.61^\circ$  (Table S3) yields  $\tau'_4 = 0.86$ .



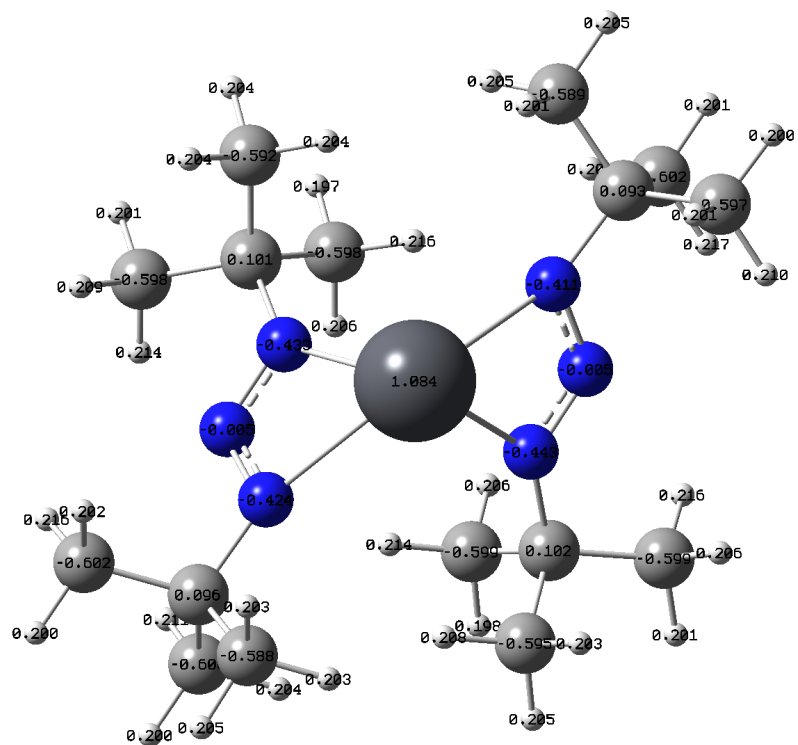

Figure S22: NBO charges for 3.
